# Supplementary material for: eIF4E1b is a non-canonical eIF4E protecting maternal dormant mRNAs
Source: PubMed Central journal article supplement (PMC10883267; doi:10.1038/s44319-023-00006-4), 2023-12-14
Supplement: 44319_2023_6_MOESM1_ESM.pdf [file 44319_2023_6_MOESM1_ESM.pdf]

# **eIF4E1b is a non-canonical eIF4E protecting maternal dormant mRNAs**

Laura Lorenzo-Orts, Marcus Strobl, Benjamin Steinmetz, Friederike Leesch, Carina Pribitzer, Josef Roehsner, Michael Schutzbier, Gerhard Dürnberger, Andrea Pauli

## ***Appendix***

Table of contents:

|                    |   |
|--------------------|---|
| Appendix Figure S1 | 2 |
| Appendix Figure S2 | 3 |
| Appendix Figure S3 | 4 |
| Appendix Figure S4 | 5 |
| Appendix Figure S5 | 6 |
| Appendix Table S1  | 7 |

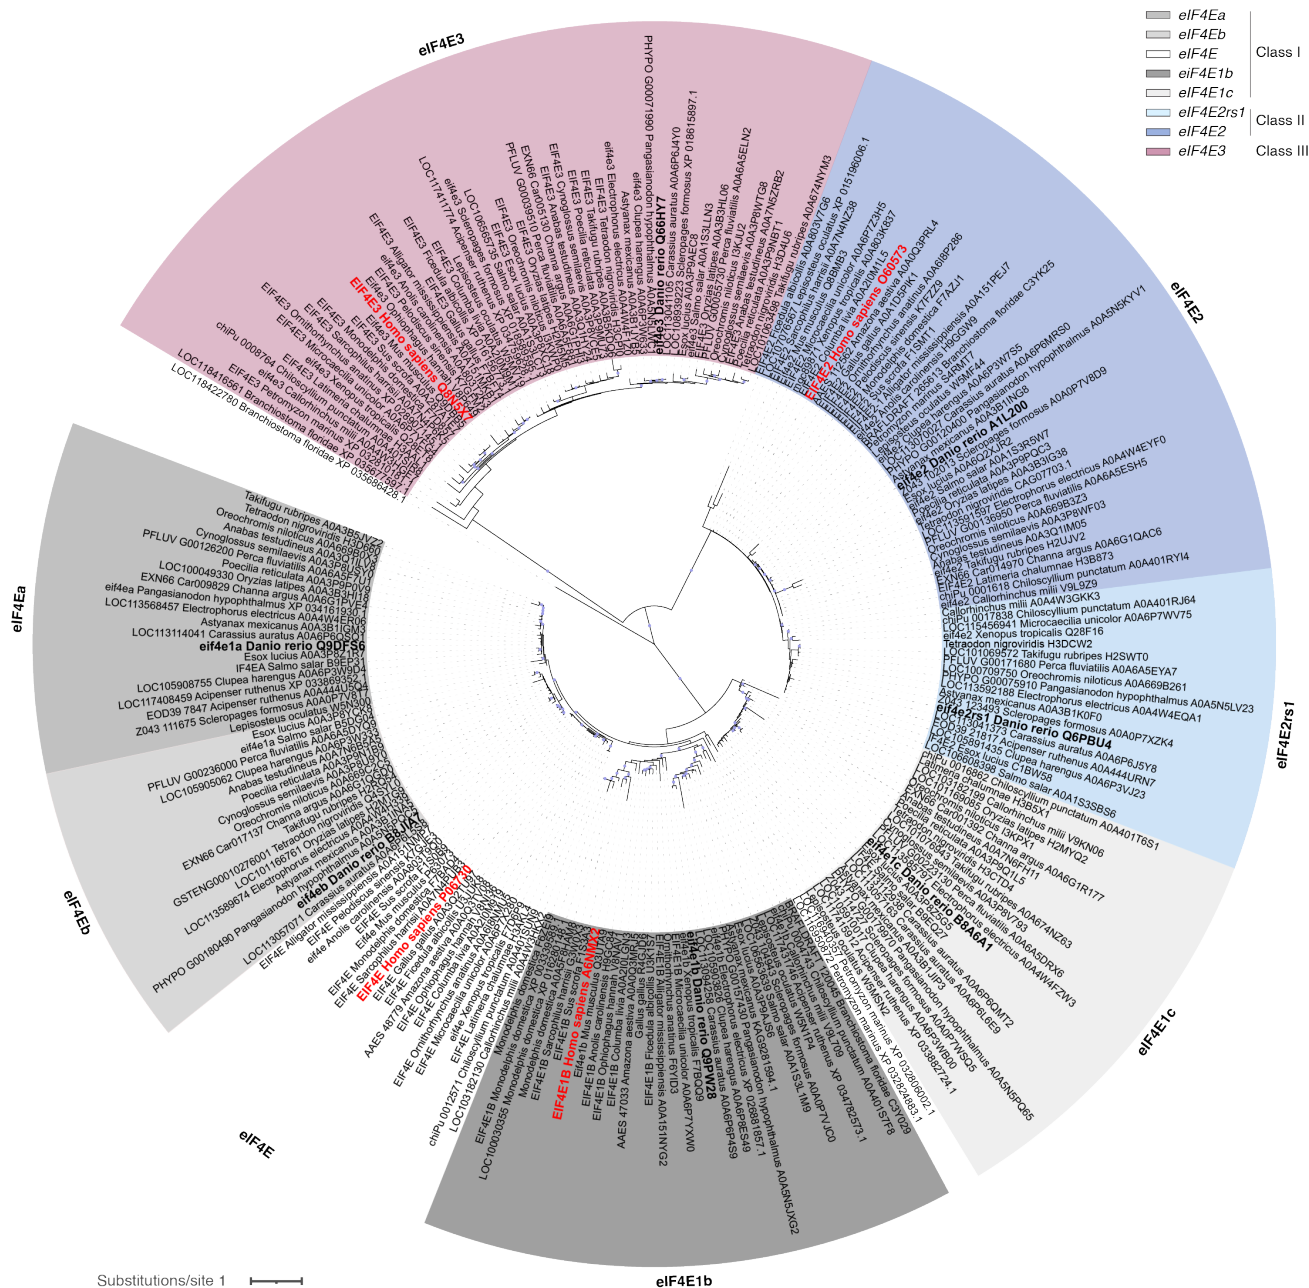

**Appendix Figure S1. Phylogenetic analysis of vertebrate eIF4Es.** Phylogenetic tree showing 3 major branches that correspond to 3 eIF4E classes: class I with eIF4Ea, eIF4Eb, eIF4E, eIF4E1b and eIF4E1c, class II with eIF4E2rs1 and eIF4E2, and class III with eIF4E3. Branches that are supported by an ultrafast bootstrap (UFBoot) value  $\geq 95\%$  are indicated by a grey dot. Branch lengths represent the inferred number of amino acid substitutions per site, and branch labels are composed of gene name (if available), genus, species, and accession number. Zebrafish genes (black) and human genes (red) are highlighted in bold.

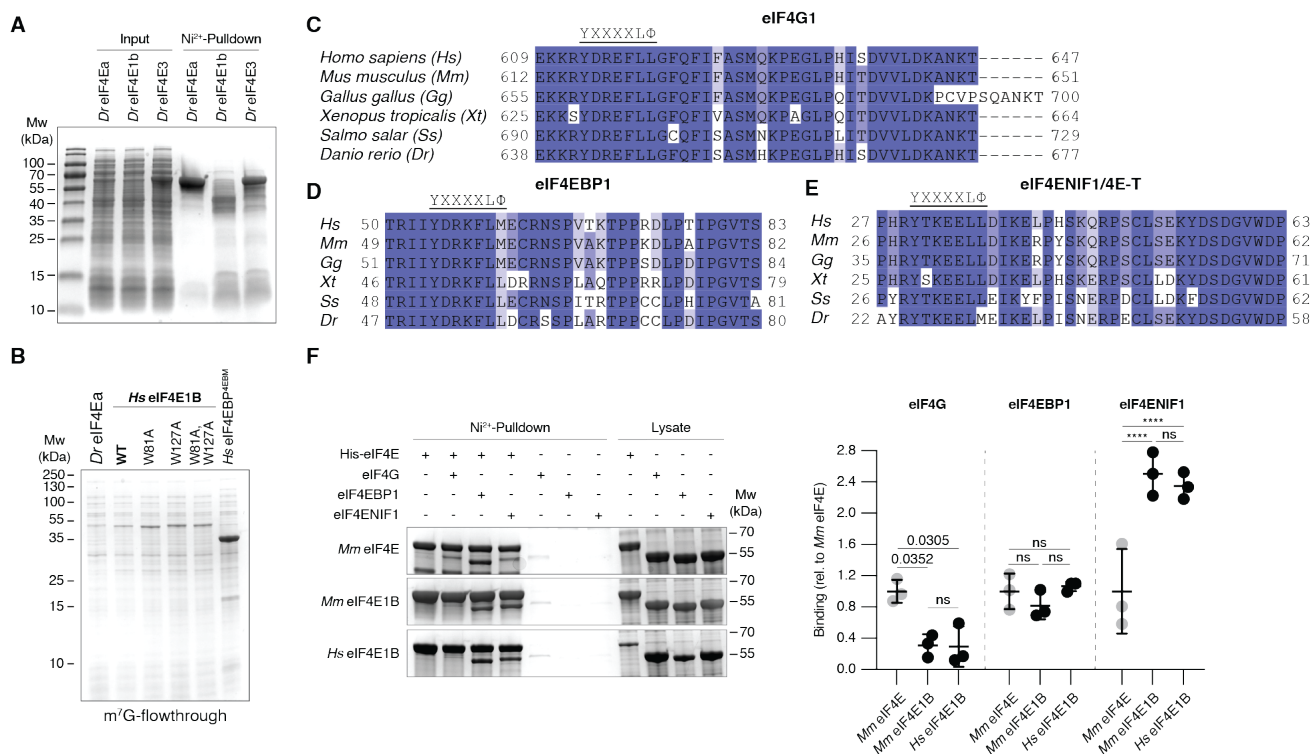

**Appendix Figure S2. Human eIF4E1B interacts with the eIF4E-binding motifs of human eIF4EBP1 and eIF4ENIF1, which are conserved across vertebrates.**

**A** Coomassie stained gel of a pull-down assay using  $\text{Ni}^{2+}$  beads and bacterial lysates containing His- and MBP-tagged zebrafish (*Danio rerio*, *Dr*) eIF4Ea, eIF4E1b and eIF4E3. Inputs corresponding to the soluble fractions of the lysates are shown on the left; elutions are shown on the right.

**B** Coomassie stained gel of flow-through fractions from an immunoprecipitation assay using  $m^7\text{G}$ -coated beads and *E. coli* lysates containing eIF4Es and eIF4EBP1.

**C-E** Amino acid alignments of the eIF4E-binding motifs (4EBMs) of eIF4G1 (**C**), eIF4EBP1 (**D**) and eIF4ENIF1/4E-T (**E**) from six vertebrate species. The species abbreviations are shown in **C**. The canonical YXXXXLΦ eIF4E-binding motif is indicated (X = any amino acid; Φ = hydrophobic residue).

**F** Human and mouse eIF4E1Bs show similar affinities for eIF4E-binding proteins. Representative Coomassie-stained gels of in vitro pull-down assays with bacteria lysates is shown on the left. Quantification are shown on the right (lines indicate mean with SD;  $n = 3$  independent experiments; mouse eIF4E and eIF4E1B data is also shown in **Fig 2D**). Statistical analysis was performed with two-way ANOVA followed by Sidak's multiple comparisons test (ns: non-significant).

Data information: In **A** and **F**, predicted molecular weights (in kDa) are: *Dr* eIF4Ea, *Dr* eIF4E1b, *Mm* eIF4E1B and *Hs* eIF4E1B = 65; *Mm* eIF4E = 66; *Dr* eIF4E3 = 64; *Hs* eIF4G<sup>[4EBM]</sup> and *Hs* eIF4ENIF1<sup>[4EBM]</sup> = 53; *Hs* eIF4EBP1<sup>[4EBM]</sup> = 52.

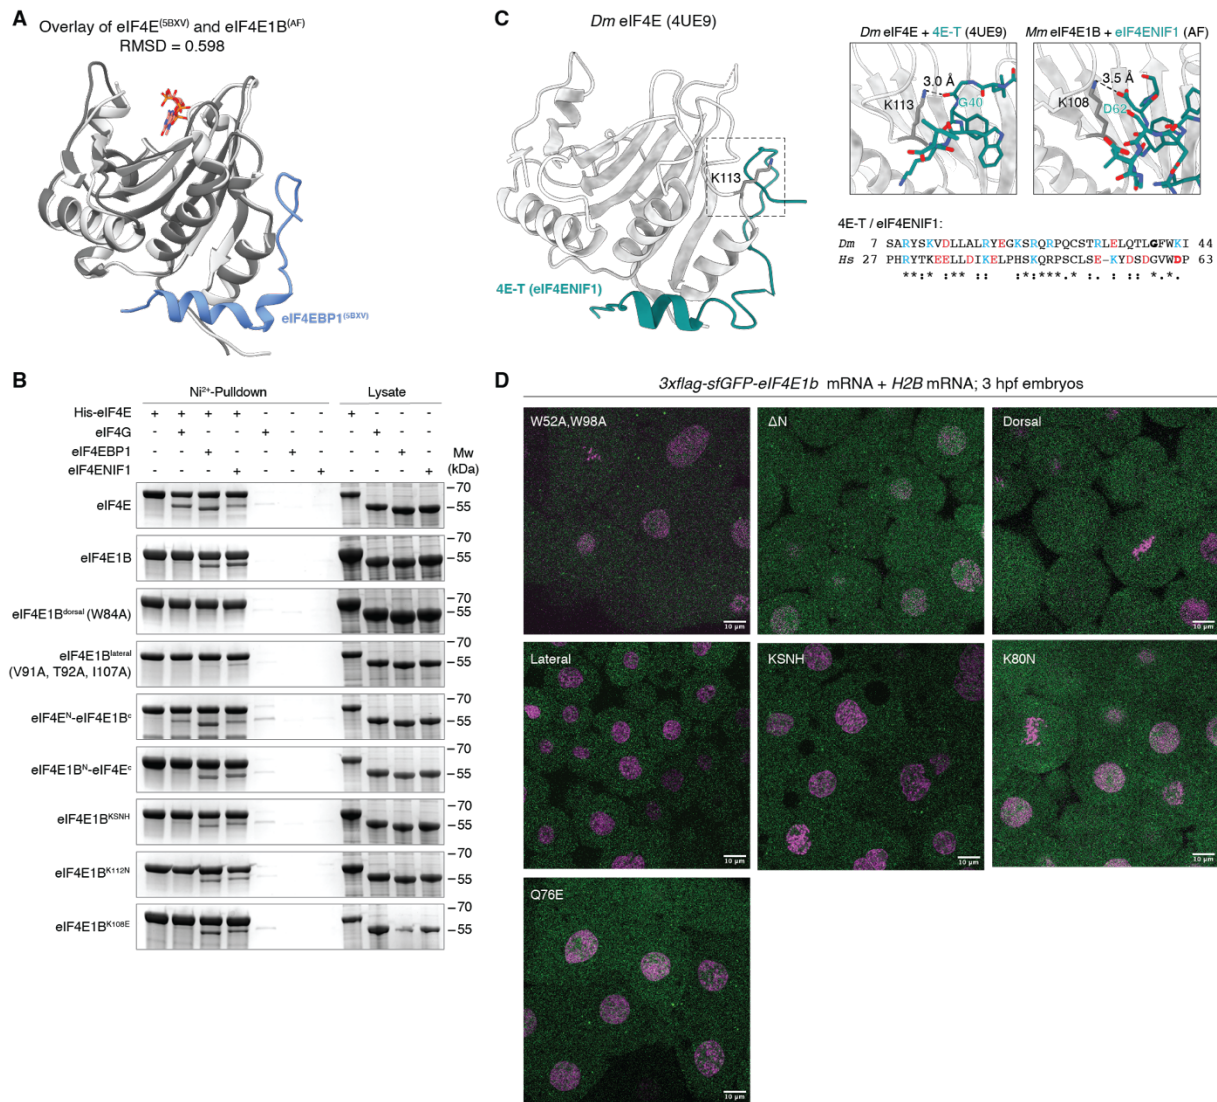

### Appendix Figure S3. Interrogating the interaction between eIF4E1b and EIF4NIF1.

**A** Superimposed structures of mouse eIF4E (PDB-5BXV, Sekiyama *et al.*, 2015) and mouse eIF4E1B (predicted by AlphaFold, AF). RMSD = root-mean-square deviation.

**B** Representative Coomassie-stained gels from pulldown assays with mouse eIF4E1B mutants. Quantifications are shown in **Fig 3D**. Predicted molecular weights (in kDa) are: *Mm* eIF4E1B, *Mm* eIF4E<sup>N</sup>-eIF4E1B<sup>C</sup> and *Mm* eIF4E1B<sup>N</sup>-eIF4E<sup>C</sup> = 65; *Mm* eIF4E = 66; *Hs* eIF4G<sup>[4EBM]</sup> and *Hs* eIF4ENIF1<sup>[4EBM]</sup> = 53; *Hs* eIF4EBP1<sup>[4EBM]</sup> = 52. 4EBM = eIF4E-binding motif.

**C** Structural representation of *Drosophila melanogaster* (*Dm*) eIF4E in complex with 4E-T (PDB-4UE9, Peter *et al.*, 2015). The nitrogen of Lys113 of *Dm* eIF4E (corresponding to Lys108 of mouse eIF4E1B) forms a main-chain contact (dashed line) with the carbonyl oxygen of Gly40 of *Dm* 4E-T. In contrast, Lys108 of mouse eIF4E1B is predicted to interact with Asp62 of eIF4ENIF1 in AF. An alignment of *Dm* 4E-T and *Hs* eIF4ENIF1 binding motifs is shown on the bottom right: \* = identical residues; : = similar residues; red: acid; blue: basic; bold: interacting with Lys113 or Lys108 of *Dm* eIF4E or *Mm* eIF4E1B, respectively.

**D** Confocal microscopy images of 1k-cell embryos transiently expressing eIF4E1b mutant proteins from mRNAs injected at the 1-cell stage. Nuclei were labeled with *H2B-RFP* mRNA. Quantification of the number of GFP-positive foci is shown in **Fig 3H**. Scale bars = 10 μm.

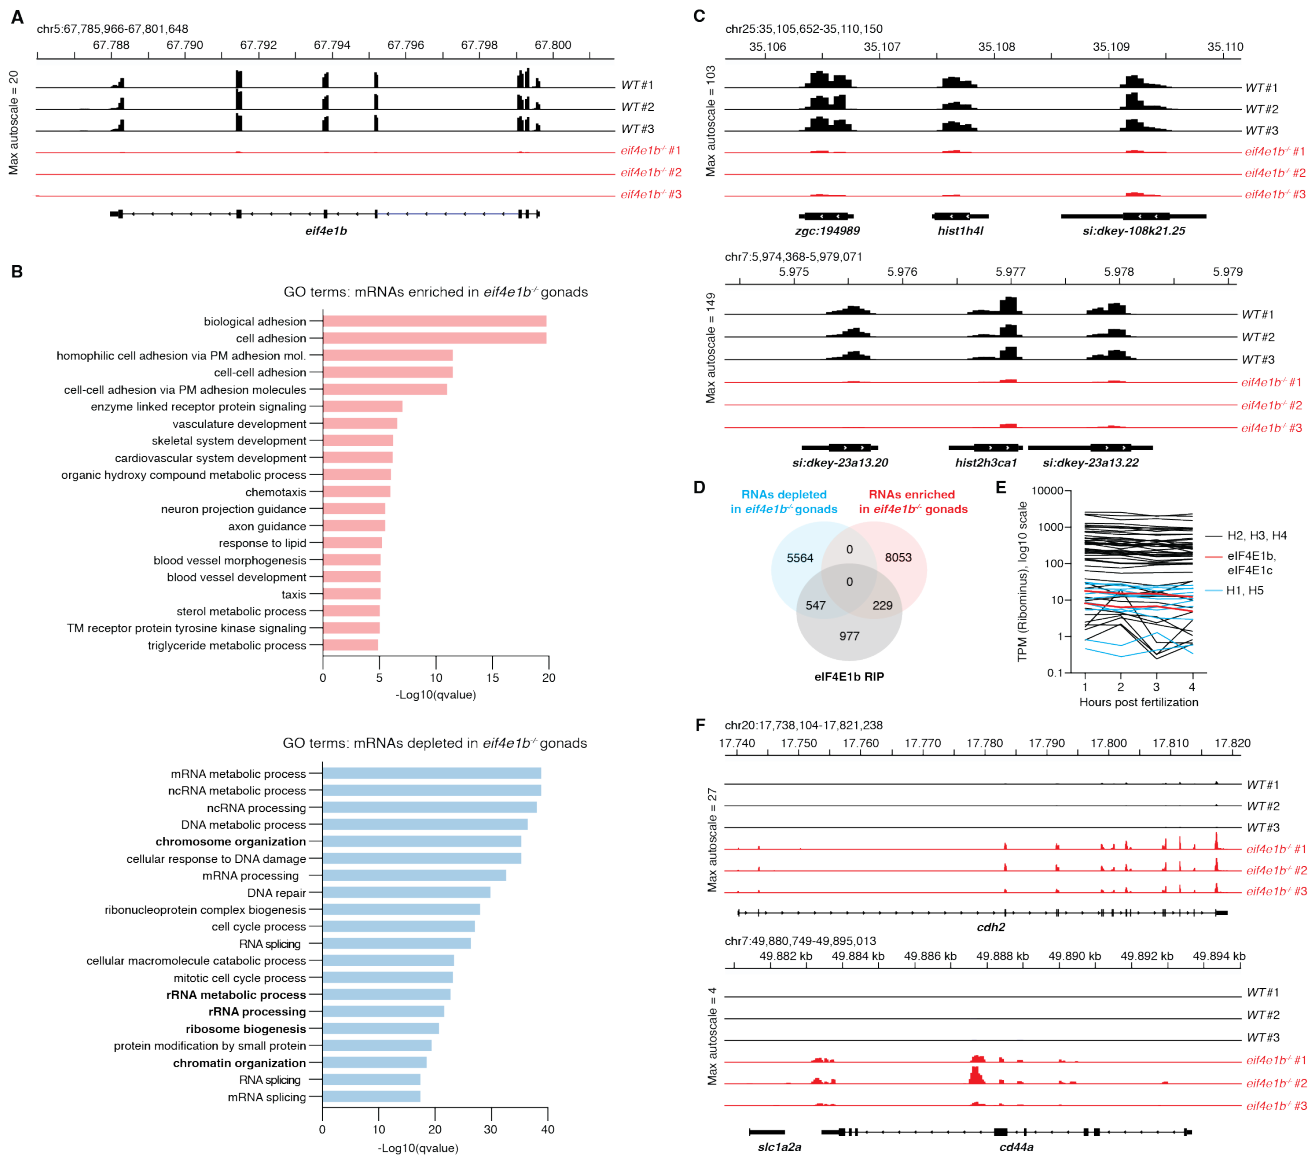

### Appendix Figure S4. Transcriptomic analyses of *eif4e1b* mutant and wild-type gonads.

**A** RNA-seq reads for the *eif4e1b* transcript in *eif4e1b* mutant and wild-type gonads isolated from juvenile fish with high expression of *ziwi:GFP*.

**B** GO term analysis of up- (top, in red) and down-regulated (bottom, in blue) mRNAs in *eif4e1b* mutant gonads with high *ziwi:GFP* expression. GO terms that are also enriched in the eIF4E1b RIP are highlighted in bold.

**C** Sequencing reads for 6 histone mRNAs in *eif4e1b* mutant and wild-type gonads isolated from juvenile fish with a high expression of *ziwi:GFP*.

**D** Venn diagram showing the overlap between mRNAs down- or up-regulated in *eif4e1b* mutant gonads with mRNAs enriched in the eIF4E1b RIP at 1.25 hours post fertilization.

**E** Histone mRNA abundance (in transcripts per million, TPM) during the first four hours post fertilization according to published rRNA-depleted RNA-seq data (Cabrera-Quio *et al.*, 2021).

**F** RNA-seq reads for cell adhesion molecule mRNAs, such as *cdh2* (top) and *cd44a* (bottom), in *eif4e1b* mutant and wild-type gonads of juvenile fish with high *ziwi:GFP* expression.

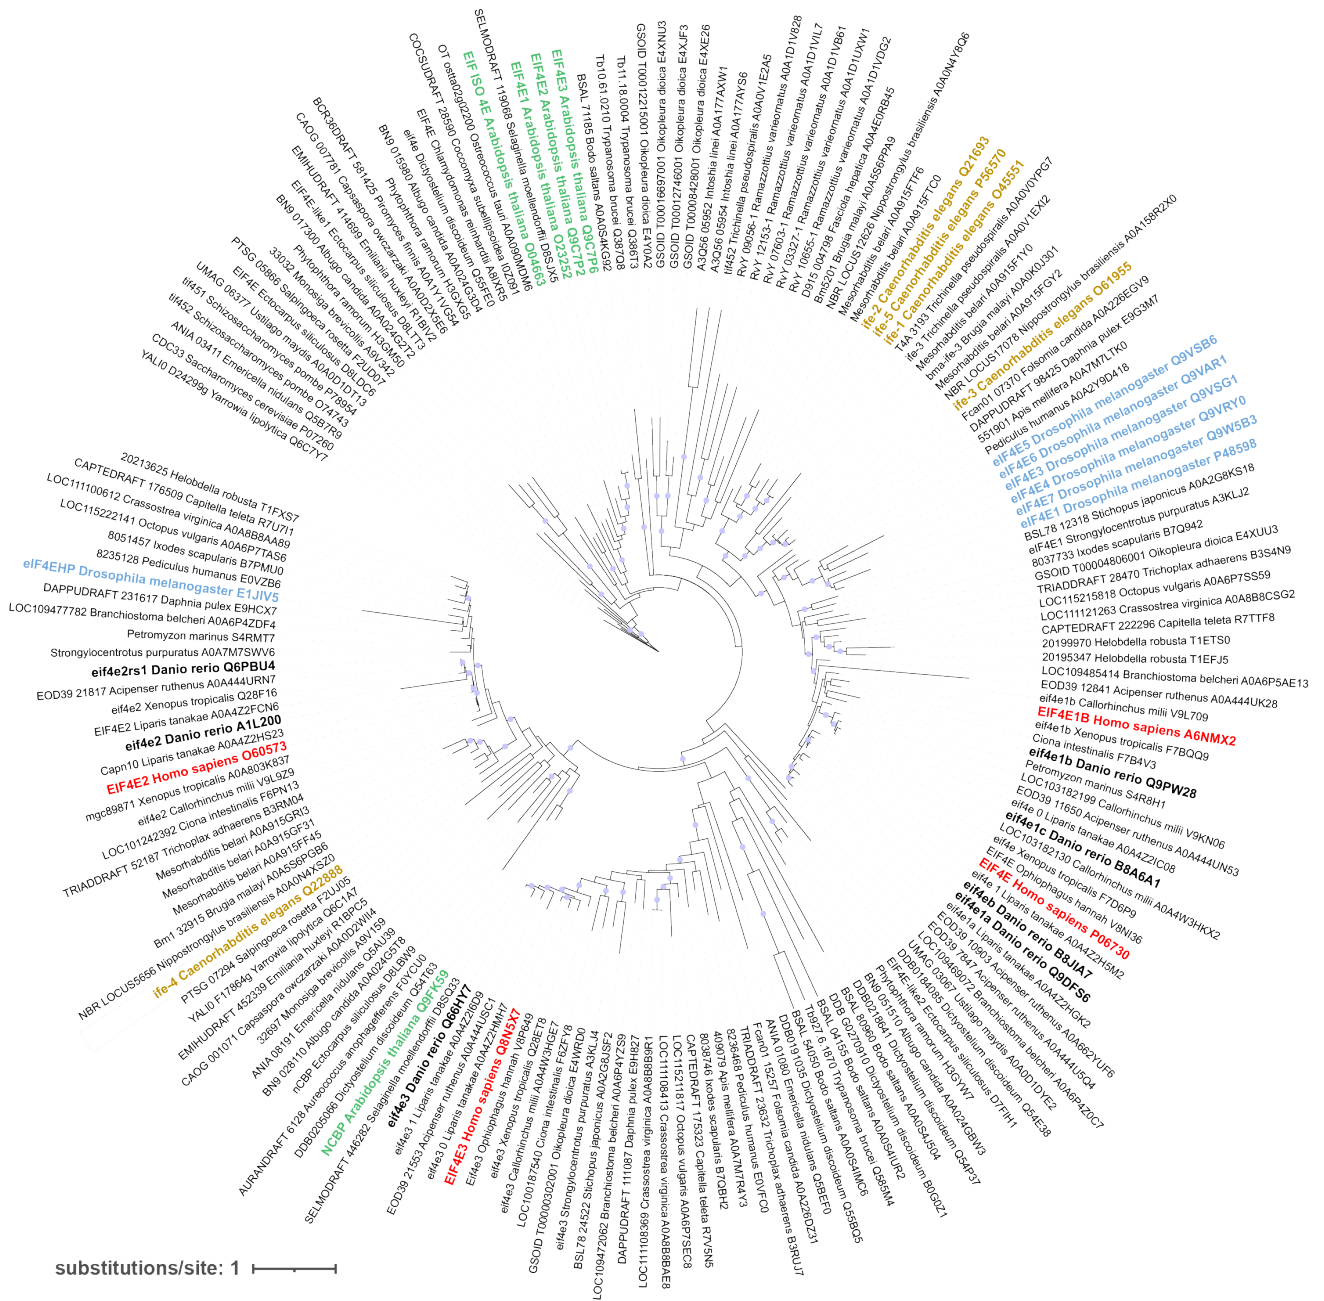

**Appendix Figure S5. Phylogenetic analysis of eIF4E proteins in eukaryotes.** Phylogenetic tree of eIF4E proteins from different species, including protists, fungi, plants, and animals (invertebrates and vertebrates). Grey dots indicate branches that are supported by an ultrafast bootstrap (UFBoot) value  $\geq 95\%$ . Branch lengths represent the inferred number of amino acid substitutions per site. Labels consist of gene name (if available), genus, species, and accession number. eIF4E proteins from specific organisms are highlighted in bold: zebrafish (black), human (red), *Drosophila melanogaster* (blue), *Caenorhabditis elegans* (goldenrod), and *Arabidopsis thaliana* (green).

**Appendix Table S1. List of primers used for RT-qPCR or RT-PCR in this study.** Genes dysregulated in *eIF4E1b* or *eIF4E1c* overexpressing (OE) embryos are highlighted in violet (down) or blue (up).

|                                   | Name               | Sequence                |
|-----------------------------------|--------------------|-------------------------|
| qPCR in <i>eIF4E1c</i> OE embryos | si:ch211-226h8.4-F | TGTGTTCTCTGATCCCTGTTATG |
|                                   | si:ch211-226h8.4-R | GAGACGCTGGCAGAGAAAT     |
|                                   | zgc:112146-F       | GCAACACTCGACACAAGAGA    |
|                                   | zgc:112146-R       | TTCCAGTGTAGTCCACAAATCC  |
|                                   | gcdhb-F            | CCCGTTTGGGTGTCTGAATAA   |
|                                   | gcdhb-R            | GTCCAGTGTGTACTGTCTTGTG  |
|                                   | commd3-F           | AAGTGTGCGAGAGAGCAACAC   |
|                                   | commd3-R           | ACAACCACAGCACCAGATAATA  |
|                                   | aldh9a1b-F         | CAAGGACAGGTGTGCAGTAA    |
|                                   | aldh9a1b-R         | GAGGGTCTCCAATGCTGATAG   |
|                                   | man2b2-F           | GGGCCGATTTCCAGACAATA    |
|                                   | man2b2-R           | TCTTGGCACAATCTCCATAAC   |
|                                   | si:ch73-36611.5-F  | TCCACCAAGTTTGAGAAGAGATT |
|                                   | si:ch73-36611.5-R  | CAGTGATCCTTGAGGCTGATATT |
| qPCR in <i>eIF4E1b</i> OE embryos | zgc:103559-F       | CCTCATGTAACCGATGCTGAT   |
|                                   | zgc:103559-R       | GGATGCGAGAGTCTTGTCT     |
|                                   | scp2b-F            | GGAGGAGTCAGTCAGGAAGAA   |
|                                   | scp2b-R            | CCGTATTACACAGAGGCTGAAC  |
|                                   | fi32c03-F          | CCCCTGCTATTCCACAAACT    |
|                                   | fi32c03-R          | CGACACAAGGATCAGAGAACAC  |
|                                   | zgc:85777-F        | TGAGCTGCAGATGGAGATTG    |
|                                   | zgc:85777-R        | GCCAACTTCGTACATCATTTTC  |
|                                   | zp3-F              | GCCAATGGATGGTTTGCTAATG  |
|                                   | zp3-R              | CTTCCCCTGAATGCCTCTAAA   |
|                                   | zp3.2-F            | TGGTGTGAAGCCAACTTA      |
|                                   | zp3.2-R            | GATTCCTTTGCGGCTCTTG     |
|                                   | zgc:152936-F       | GCTATGTACCAGCCACCAAT    |
|                                   | zgc:152936-R       | ACGCCTGCAGCAGTATTT      |
|                                   | aldh9a1b-F         | CAAGGACAGGTGTGCAGTAA    |
|                                   | aldh9a1b-R         | GAGGGTCTCCAATGCTGATAG   |
|                                   | neu3.2-F           | CTGCCATCCAGCCGATAAA     |
|                                   | neu3.2-R           | GACCCTCATGCAGAATCACA    |
|                                   | clpb-F             | TCGATGATGTGCAGAAGAGTG   |
|                                   | clpb-R             | AACTCGTCCCCTCTGAAATG    |
|                                   | gchfr-F            | CCTGTGAATGCAGACAGGTAA   |
|                                   | gchfr-R            | GCACACGTTTGAAATCTCTT    |
|                                   | zgc:101569-F       | GGCTCTTGAACCTCGAGAA     |
|                                   | zgc:101569-R       | GTTGAAGGAGGTGGAGTCAA    |
| Tethering                         | actb2-F            | ATCAGGGTGTTCATGGTTGGT   |
|                                   | actb2-R            | CACGCAGCTCGTTGTAGAAAG   |
|                                   | sfGFP F            | GACAACCCTGACATACGGAG    |
|                                   | sfGFP R            | TTCCGTCATCCTTGAAGCTG    |
